# Supplementary material for: No Benefit in Memory Performance after Nocturnal Memory Reactivation Coupled with Theta-tACS
Source: MDPI journal article supplement (doi:10.3390/clockssleep6020015), 2024-03-25

# Supplementary Material

for

## No benefit in memory performance after nocturnal memory reactivation coupled with theta-tACS

Sandrine Baselgia<sup>1</sup>, Björn Rasch<sup>1\*</sup>, Florian H. Kasten<sup>2,3</sup>, Christoph S. Herrmann<sup>4</sup>, Sven  
Paßmann<sup>1,5,\*</sup>

<sup>1</sup> Cognitive Biopsychology and Methods, Department of Psychology, Université de Fribourg,  
Fribourg, Switzerland

<sup>2</sup> Centre de Recherche Cerveau & Cognition, CNRS, Toulouse, France

<sup>3</sup> Université Toulouse III Paul Sabatier, Toulouse, France

<sup>4</sup> Experimental Psychology Lab, Department of Psychology, Carl von Ossietzky Universität,  
Oldenburg, Germany

<sup>5</sup> Department of Neurology, University Medicine Greifswald, Greifswald, Germany

\*Corresponding author:

Sven Paßmann, University of Fribourg, Department of Biopsychology and Methods, Rue P.-A.-de-  
Faucigny 2, 1700 Fribourg, Switzerland

e-mail: sven.passmann@unifr.ch

or

Björn Rasch, University of Fribourg, Department of Biopsychology and Methods, Rue P.-A.-de-  
Faucigny 2, 1700 Fribourg, Switzerland

Tel. +41 26 300 7637, e-mail: bjoern.rasch@unifr.ch

**Table S1: The two lists of Dutch-German word-pairs** used in the paired-associate learning (PAL) task, and the unlearned new words presented only during reactivation.

| List 1 |          | List 2 |            | New Words |
|--------|----------|--------|------------|-----------|
| Been   | Bein     | Bij    | Biene      | Beek      |
| Deur   | Tuer     | Kok    | Koch       | Beurs     |
| App    | Affe     | Bloem  | Blume      | Brug      |
| Baan   | Beruf    | Bloes  | Bluse      | Buis      |
| Bel    | Klingel  | Boek   | Buch       | Deun      |
| Blik   | Blech    | Boer   | Bauer      | Dolk      |
| Bol    | Kugel    | Bot    | Knochen    | Eed       |
| Bord   | Teller   | Bout   | Bolzen     | Fles      |
| Borst  | Brust    | Buks   | Buechse    | Gids      |
| Bos    | Wald     | Deel   | Teil       | Inkt      |
| Breuk  | Bruch    | Gat    | Loch       | Keus      |
| Buik   | Bauch    | Gif    | Gift       | Kroeg     |
| Dak    | Dach     | Heup   | Huefte     | Kus       |
| Deuk   | Delle    | Hoed   | Hut        | Lui       |
| Dief   | Dieb     | Hut    | Huette     | Mist      |
| Dijk   | Deich    | Jas    | Jacke      | Muts      |
| Doek   | Tuch     | Kluis  | Tresor     | Muur      |
| Drop   | Lakritz  | Krat   | Kasten     | Pad       |
| Feit   | Tatsache | Lijf   | Leib       | Pak       |
| Fout   | Fehler   | Lip    | Lippe      | Peil      |
| Geur   | Geruch   | Mand   | Korb       | Plas      |
| Hak    | Absatz   | Mes    | Messer     | Plein     |
| Hei    | Heide    | Mop    | Witz       | Pomp      |
| Hiel   | Ferse    | Mug    | Muecke     | Prei      |
| Hok    | Schuppen | Munt   | Muenze     | Prent     |
| Hout   | Holz     | Neef   | Neffe      | Prijs     |
| Hulp   | Hilfe    | Oog    | Auge       | Reis      |
| Ijs    | Eis      | Pan    | Topf       | Rib       |
| Jurk   | Kleid    | Piek   | Gipfel     | Rit       |
| Kast   | Schrank  | Poes   | Katze      | Rug       |
| Kerk   | Kirche   | Pols   | Puls       | Rups      |
| Kier   | Spalt    | Pont   | Faehre     | Schok     |
| Kip    | Huhn     | Prik   | Spritze    | Sla       |
| Klant  | Kunde    | Rek    | Regal      | Stof      |
| Koor   | Chor     | Rij    | Reihe      | Tas       |
| Kop    | Tasse    | Rijst  | Reis       | Trui      |
| Kras   | Kratzer  | Roer   | Ruder      | Tuin      |
| Kruk   | Kruecke  | Rouw   | Trauer     | Vork      |
| Krul   | Locke    | Rust   | Ruhe       | Vorst     |
| Kust   | Kueste   | Schol  | Scholle    | Vos       |
| Kwal   | Qualle   | Sjaal  | Schal      | Walm      |
| Lens   | Linse    | Slot   | Schloss    | Wol       |
| Lijm   | Kleber   | Snor   | Schnurbart | Zalm      |
| Loof   | Laub     | Som    | Summe      | Zeil      |
| Luis   | Laus     | Spaak  | Speiche    |           |

|       |          |       |           |
|-------|----------|-------|-----------|
| Melk  | Milch    | Spier | Muskel    |
| Mond  | Mund     | Spoor | Gleis     |
| Neus  | Nase     | Stoot | Stoss     |
| Nier  | Niere    | Stuur | Lenkrad   |
| Pijp  | Pfeife   | Taal  | Sprache   |
| Plak  | Scheibe  | Tand  | Zahn      |
| Raam  | Fenster  | Teef  | Zecke     |
| Rem   | Bremse   | Teek  | Zecke     |
| Reu   | Ruede    | Tent  | Zelt      |
| Riem  | Leine    | Trap  | Treppe    |
| Schat | Liebling | Vacht | Fell      |
| Sluis | Schleuse | Veer  | Feder     |
| Soep  | Suppe    | Vent  | Kerl      |
| Tijd  | Zeit     | Vis   | Fisch     |
| Tong  | Zunge    | Vuil  | Schmutz   |
| Uur   | Stunde   | Vuur  | Feuer     |
| Vlees | Fleisch  | Wei   | Wiese     |
| Waard | Wirt     | Wijk  | Stadtteil |
| Wet   | Gesetz   | Will  | Wille     |
| Winst | Gewinn   | Wond  | Wunde     |
| Worst | Wurst    | Zeep  | Seife     |
| Zalf  | Salbe    | Zin   | Sinn      |
| Zout  | Salz     | Zuil  | Saeule    |
| Sap   | Saft     | Steen | Stein     |
| Zon   | Sonne    | Taart | Kuchen    |

**Figure S1: Models simulated with ROAST toolbox in Matlab**, showing the electrical fields expected with the stimulation. Red electrode pad represents the target electrode, blue represents the return electrode.

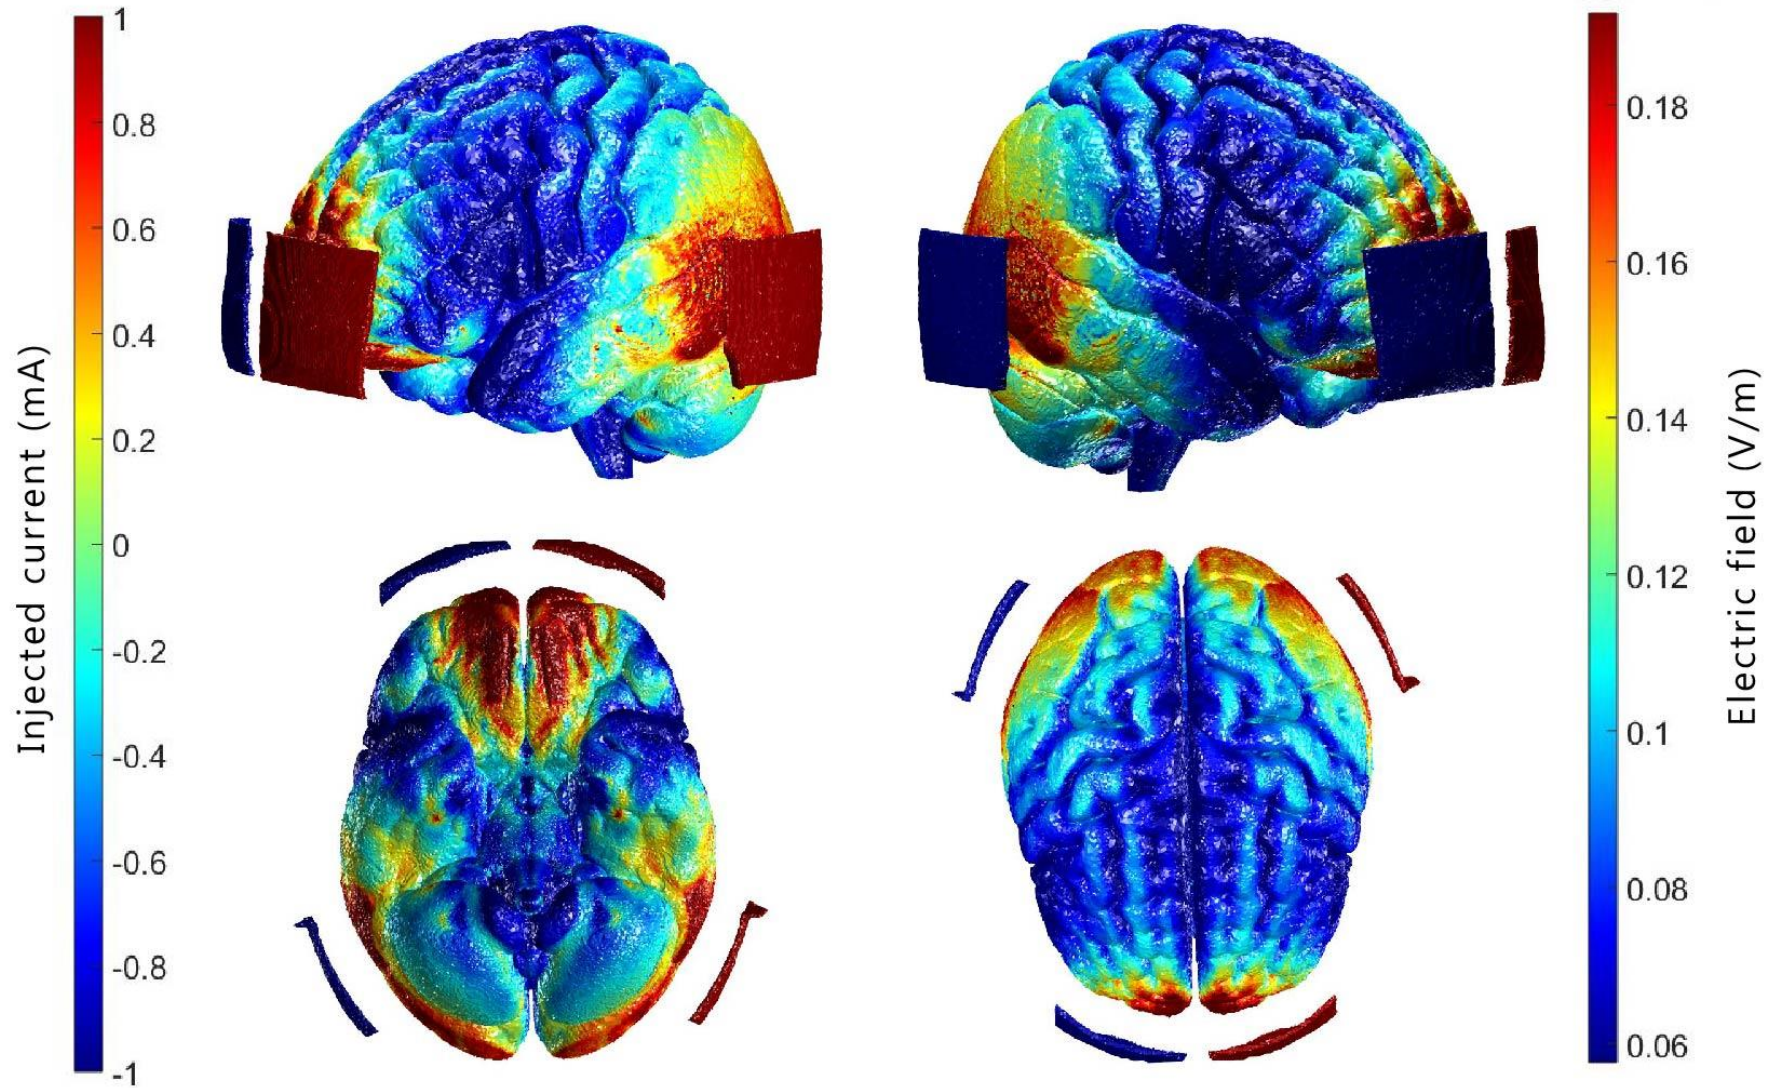

**Table S2: Values and analyses of objective sleep parameters and oscillatory power during sleep.**

|                                            | Continuous      | Time-locked      | <i>t</i> | <i>p</i>           | <i>d</i> |
|--------------------------------------------|-----------------|------------------|----------|--------------------|----------|
| <b>Objective sleep parameters (N=36)</b>   |                 |                  |          |                    |          |
| Total Time in Bed                          | 489 ± 6.61      | 520 ± 3.78       | -2.93    | <b>.006**</b>      | 0.91     |
| WASO [%]                                   | 6.28 ± 0.77     | 3.65 ± 0.37      | 2.26     | <b>.031*</b>       | 0.69     |
| N1 [%]                                     | 5.14 ± 0.54     | 4.75 ± 0.45      | 0.39     | .697               | 0.13     |
| N2 [%]                                     | 44.53 ± 1.19    | 45.90 ± 1.03     | -0.61    | .548               | 0.20     |
| N3 [%]                                     | 12.80 ± 0.64    | 16.49 ± 0.90     | -2.22    | <b>.036*</b>       | 0.80     |
| REM [%]                                    | 20.98 ± 0.85    | 20.68 ± 0.54     | 0.21     | .832               | 0.07     |
| WASO [min]                                 | 31.24 ± 3.94    | 19.23 ± 1.95     | 1.99     | .055 <sup>a</sup>  | 0.61     |
| N1 [min]                                   | 25.64 ± 2.82    | 24.90 ± 2.49     | 0.14     | .892               | 0.05     |
| N2 [min]                                   | 217.45 ± 5.95   | 237.37 ± 4.66    | -1.85    | .073 <sup>a</sup>  | 0.60     |
| N3 [min]                                   | 62.55 ± 3.08    | 85.43 ± 4.79     | -2.66    | <b>.015*</b>       | 0.97     |
| REM [min]                                  | 102.95 ± 4.09   | 107.20 ± 2.89    | -0.60    | .552               | 0.19     |
| TST [min]                                  | 408.56 ± 6.86   | 454.90 ± 3.40    | -4.42    | <b>&lt;.001***</b> | 1.35     |
| SOL [min]                                  | 17.02 ± 2.25    | 24.27 ± 2.96     | -1.30    | .205               | 0.46     |
| Stimulation time [%]                       | 10.26 ± 0.36    | 8.51 ± 0.19      | 3.18     | <b>.003**</b>      | 0.98     |
| Stimulation time [min]                     | 49.69 ± 1.37    | 44.03 ± 0.91     | 2.46     | <b>.019*</b>       | 0.78     |
| SWS latency [min]                          | 30.0 ± 4.51     | 31.10 ± 5.91     | -0.10    | .922               | 0.04     |
| REM latency [min]                          | 101.17 ± 5.49   | 99.23 ± 4.29     | 0.20     | 0.85               | 0.06     |
| <b>Oscillatory Power [μV] during sleep</b> |                 |                  |          |                    |          |
| in the whole night, frontal region (N=36)  |                 |                  |          |                    |          |
| Beta                                       | 0.027 ± 0.005   | 0.023 ± 0.002    | 0.98     | .336               | 0.31     |
| Theta                                      | 0.820 ± 0.073   | 1.193 ± 0.114    | -2.67    | <b>.014*</b>       | 0.96     |
| SWAB/B                                     | 543.93 ± 47.13  | 738.58 ± 48.34   | -2.47    | <b>.021*</b>       | 0.87     |
| <b>Oscillatory Power [μV] during sleep</b> |                 |                  |          |                    |          |
| in the first cycle, frontal region (N=37)  |                 |                  |          |                    |          |
| Beta                                       | 0.017 ± 0.001   | 0.027 ± 0.003    | -2.25    | <b>.036*</b>       | 0.83     |
| Theta                                      | 1.188 ± 0.116   | 1.700 ± 0.153    | -2.66    | <b>.012*</b>       | 0.90     |
| SWA/B                                      | 1125.40 ± 96.03 | 1305.53 ± 113.10 | -0.93    | .359               | 0.31     |
| <b>Oscillatory Power [μV] during sleep</b> |                 |                  |          |                    |          |

in the second cycle, frontal region (N=37)

|       |                |                |       |              |      |
|-------|----------------|----------------|-------|--------------|------|
| Beta  | 0.018 ± 0.002  | 0.022 ± 0.002  | -1.29 | .208         | 0.42 |
| Theta | 0.895 ± 0.087  | 1.295 ± 0.131  | -2.40 | <b>.024*</b> | 0.83 |
| SWA/B | 892.02 ± 92.24 | 928.18 ± 87.43 | -0.22 | .826         | 0.07 |

*Notes:* Objective sleep values are based on polysomnographic recordings. Non-rapid eye movement sleep (NREM) stage 1, 2, 3 (N1, N2, N3), rapid eye movement sleep (REM), Wake after sleep onset (WASO), total sleep time (TST), sleep onset latency (SOL), slow wave sleep (SWS) and REM latency are measured in minutes [min] and percentages indicated parietal percentage of TST [%]. For one participant of the *time-locked* group, the EEG sleep data was not recorded for the whole night, therefore, the analyses on general sleep parameters were performed on 36 participants. The oscillatory power was calculated on the complete night, and separately for the first two sleep cycles. The values are reported in microvolts. Values are Means (M) ± Standard Error of the Mean (SEM). \* indicates  $p < .05$ , \*\* indicates  $p \leq .01$ , \*\*\* indicates  $p \leq .001$ , <sup>a</sup> indicates  $p \leq .09$ . Significant results are highlighted in bold. *d* represents the effect sizes where a value below or equal to 0.2 reflects a small effect, a value between 0.2 and 0.8 reflects a medium effect, and a value above 0.8 reflects a large effect.

**Table S3: Number of Gains and Losses in *continuous* and *time-locked* group for each stimulation condition (theta-tACS, control-tACS and uncued).**

|               | Continuous  |              |             | Time-locked |              |             | Main effect of stimulation |          |          | Interaction effect |          |          |
|---------------|-------------|--------------|-------------|-------------|--------------|-------------|----------------------------|----------|----------|--------------------|----------|----------|
|               | Theta-tACS  | Control-tACS | Uncued      | Theta-tACS  | Control-tACS | Uncued      | F                          | <i>p</i> | $\eta^2$ | F                  | <i>p</i> | $\eta^2$ |
| <b>Gains</b>  | 1.76 ± 0.24 | 1.90 ± 0.27  | 2.62 ± 0.25 | 1.88 ± 0.27 | 2.13 ± 0.24  | 2.25 ± 0.15 | 1.81                       | .171     | .05      | 0.39               | .676     | .01      |
| <b>Losses</b> | 2.95 ± 0.29 | 2.33 ± 0.25  | 3.05 ± 0.38 | 3.31 ± 0.34 | 3.81 ± 0.30  | 3.25 ± 0.29 | 0.09                       | .916     | <.01     | 1.38               | .257     | .04      |

*Notes:* Gains represents the items that were not correctly remembered before sleep but correctly remembered after sleep. Losses represent the items that were correctly remembered before sleep but not correctly remembered after sleep. Values are Means (M) ± Standard Error of Mean (SEM).  $\eta^2$  represents the effect sizes where a value below or equal to .02 reflects a small effect, a value between .02 and .14 reflects a medium effect, and a value above .14 represents a large effect.

**Figure S2: Number of A) Gains and B) Losses** in *continuous* and *time-locked* group for each stimulation condition (theta-tACS, control-tACS and uncued. For both categories (gains and losses), no differences was found between the different stimulation conditions (both  $p$ -values  $> .171$ ), nor between the two groups (both  $p$ -values  $> .096$ ). No interaction was found (both  $p$ -values  $> .257$ ).

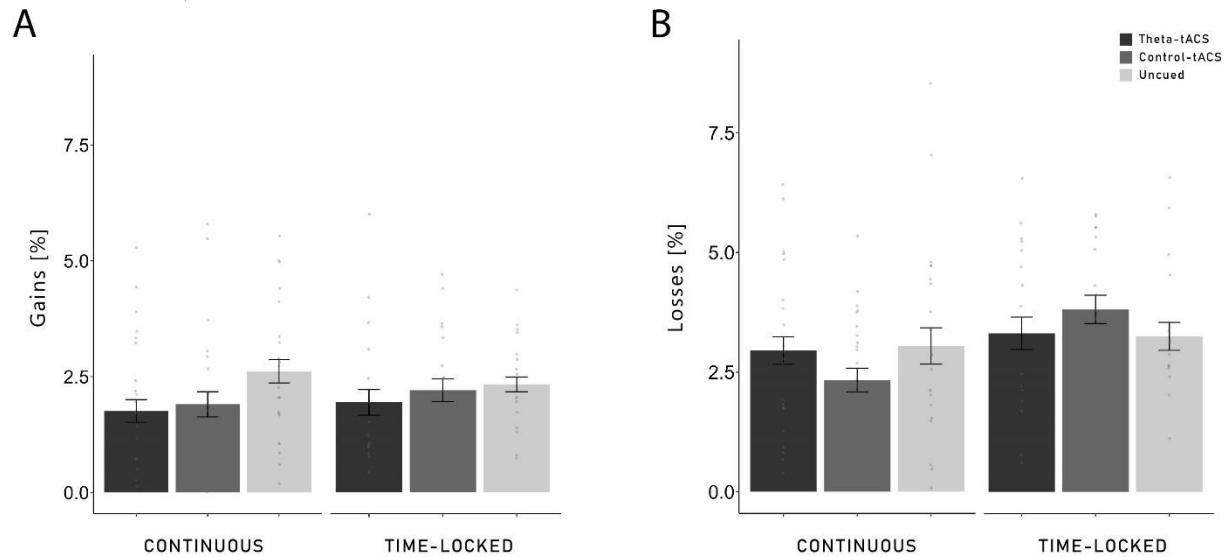

**Figure S3: Average oscillatory power** during the learning phase (pre-sleep recall) of the *time-locked* group, recorded in the frontal channels (F3, F4, F7, F8, Fz, FC5, FC6). **A) Oscillatory power changes for all words** (subsequently remembered, subsequently forgotten) during the learning phase. An increase in theta power (4-7 Hz) was observed 0.54 – 1 sec after cue onset for all words ( $p = .002$ ). **B) However, no differences in theta power were observed when comparing subsequently remembered words and subsequently forgotten words.**

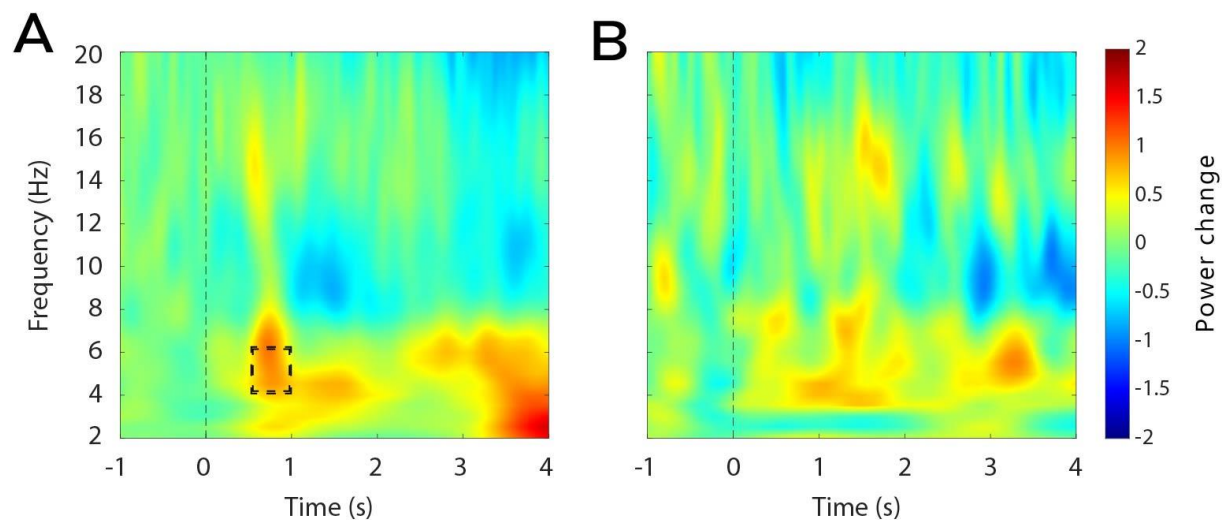

Supplement: s1 [file s1]
